# Supplementary material for: Two mixed-valence copper(i,ii) imidazolate coordination polymers: metal-valence tuning approach for new topological structuresElectronic supplementary information (ESI) available: Synthesis and additional plots for 1 and 2. See http://www.rsc.org/suppdata/cc/b4/b401691b/
Source: Royal Society of Chemistry journal article supplement (doi:10.1039/b401691b), 2004-01-01
Supplement: b401691b.doc [file b401691b.doc]

SUPPLEMENTARY DATA

**Two mixed-valence copper(I,II) imidazolate coordination polymers: Metal valence tuning approach for new topological structures**

Xiao-Chun Huang,*a,b* Jie-Peng Zhang,*a* Yan-Yong Lin*a* and Xiao-Ming Chen

School of Chemistry and Chemical Engineering, Sun Yat-Sen University, Guangzhou 510275, China

*Synthesis of* ***1***: A mixture of Cu(NO3)2∙3H2O (0.242 g, 1 mmol), Him (0.102 g, 1.5 mmol), aqueous ammonia (25%, 4 mL) and water (6 mL) was stirred for 15 min in air, then transferred and sealed in a 23-mL Teflon reactor, which was heated in an oven to 130C for 80 h. The oven was cooled to room temperature at a rate of 5C h-1. The resulting dark-green needle crystals of **1** were filtered, washed, and dried in air (yield *ca.* 70% based on Cu). Elemental analysis calcd (%) for **1** C9H9Cu2N6: C 32.93, H 2.76, N 25.60; found: C 32.89, H 2.81, N 25.54. IR data (KBr, cm-1): 3129m, 3109m, 2583w, 2504w, 1609m, 1469s, 1311s, 1233s, 1165w, 1082vs, 948s, 847s, 753s, 664s.

*Synthesis of* ***2***: A mixture of Cu(NO3)2∙3H2O (0.363 g, 1.5 mmol), Him (0.136 g, 2 mmol), aqueous ammonia (25%, 6 mL) and water (4 mL) was stirred for 15 min in air, then transferred and sealed in a 23-mL Teflon reactor, which was heated in an oven to 140C for 80 h. The oven was cooled to room temperature at a rate of 5C h-1. The resulting mauve plate-like crystals of **2** were filtered, washed, and dried in air (yield *ca.* 60% based on Cu). Elemental analysis calcd (%) for **2** C12H12Cu3N8: C 31.41, H 2.64, N 24.42; found: C 31.38, H 2.71, N 24.44. IR data (KBr, cm-1): 3142m, 3117m, 2582w, 2505w, 1580m, 1484s, 1310s, 1239s, 1172w, 1085vs, 951s, 828s, 762s, 749s, 669s.

(a) (b)

**Figure S1.** The infinite CuI chain (a) in **1** (b) in **2**.

(a) (b)

**Figure S2.** The schematic diagram of 2D net (one layer) (a) and 3D NbO net (three layers stacking in ABC pattern) (b) in **2**. Purple spheres represent for CuII atoms, blue spheres for CuI atoms and black spheres for im fragments.

(a)

(b)

**Figure S3.** Temperature dependent **eff and magnetic susceptibility (inset) for **1** (a) and **2** (b) at 10 kOe. The **eff values at 300 K are 1.836 B.M. per Cu2 unit for **1** and 1.691 B.M. per Cu3 unit for **2**.
